# Supplementary material for: Elucidating Emergence and Transmission of Multidrug-Resistant Tuberculosis in Treatment Experienced Patients by Whole Genome Sequencing
Source: PLOS journal article supplement (doi:10.1371/journal.pone.0083012), 2013-12-11

**Figure S1 Variation density map for 51 samples.**

Variation density maps for SNPs (blue) and small indels (orange) were generated using Circos software ([www.circos.com](http://www.circos.com)). The dark grey concentric lines represent 1 variant/kb, the light grey lines represent 0.5 variant/kb.

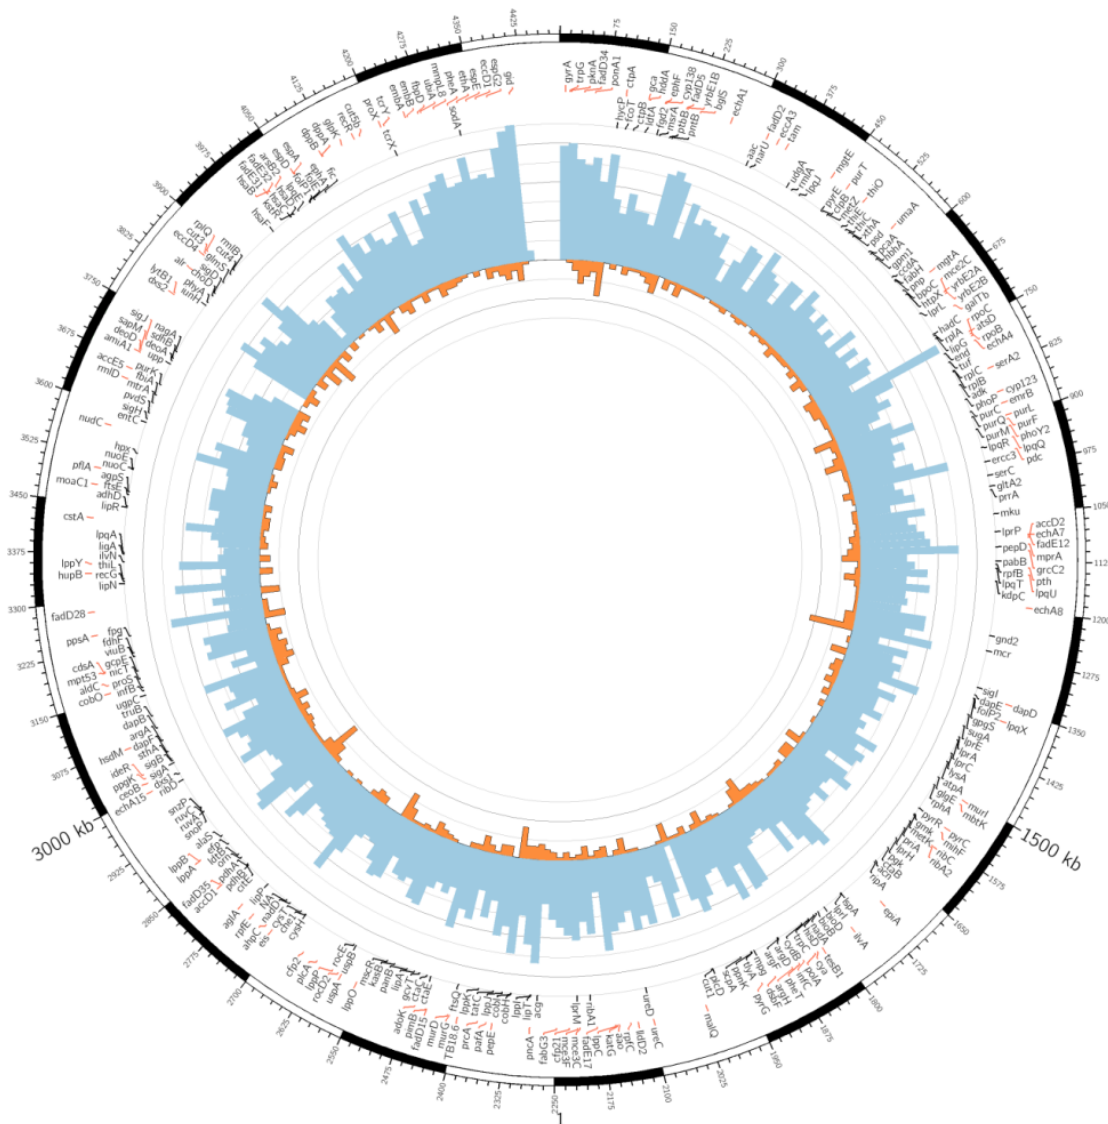

Supplement: S1 (10.1371/journal.pone.0083012.s001) [file journal.pone.0083012.s001]
